# Supplementary material
Source: Springer Nature journal article supplement (https://www.springermedizin.de/resource/supplementary/12885_2008_1232_MOESM3_ESM.pdf/9471478)

A

24h treatment

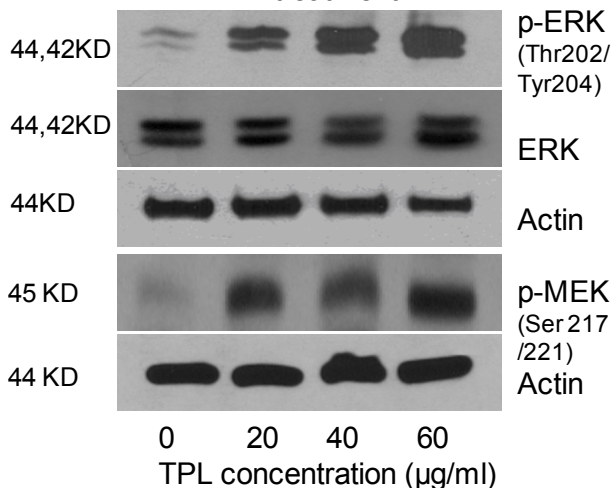60  $\mu\text{g/ml}$  TPL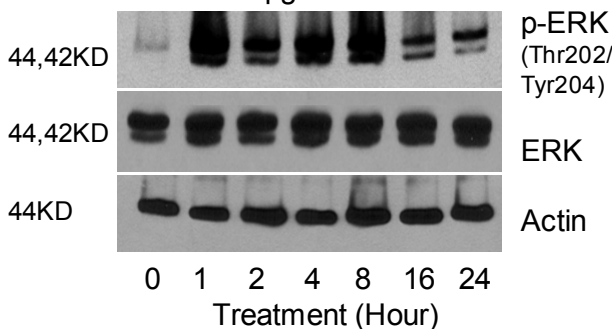

B

ERK kinase assay

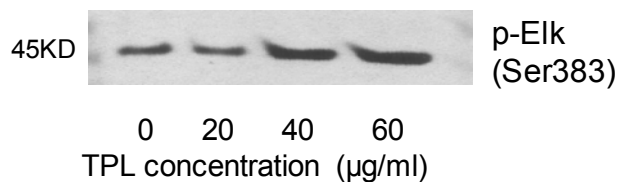

C

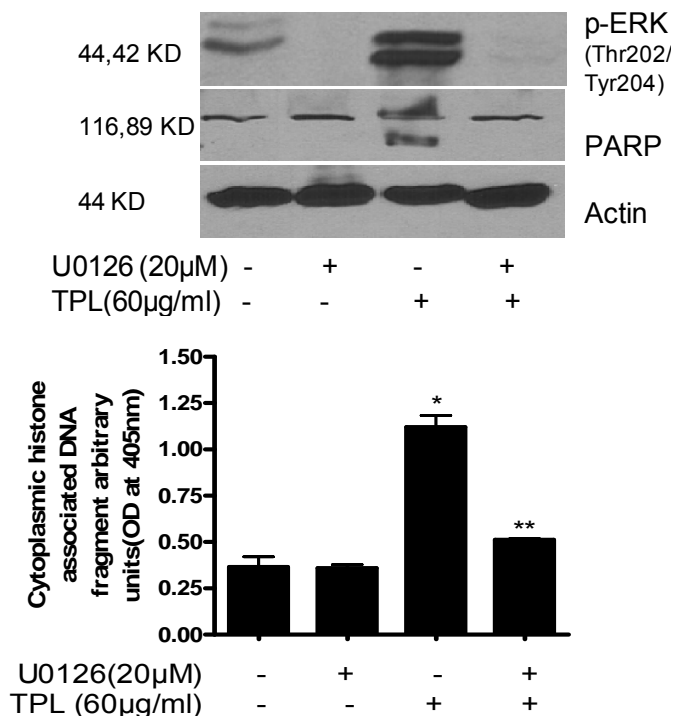

D

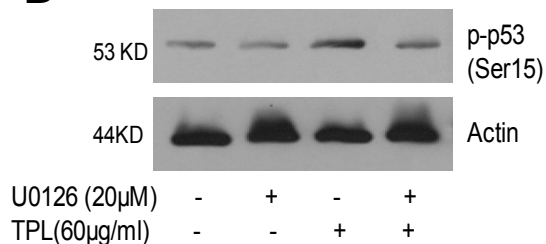

E

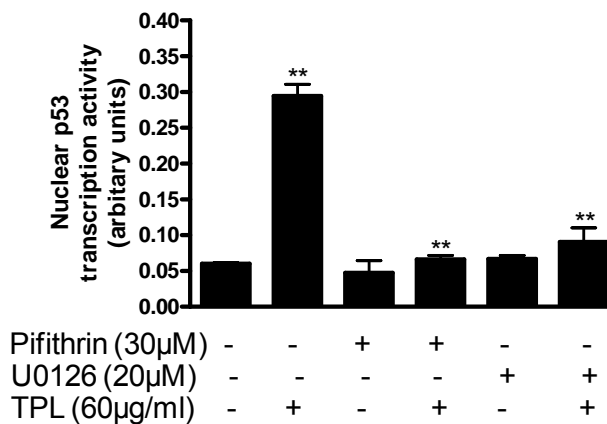

Supplement: MOESM3 [file 9471478]
